# Supplementary material
Source: PubMed Central journal article supplement (PMC8815383)
Supplement: 11684_2021_914_MOESM1_ESM.pdf [file 11684_2021_914_MOESM1_ESM.pdf]

Figure S1

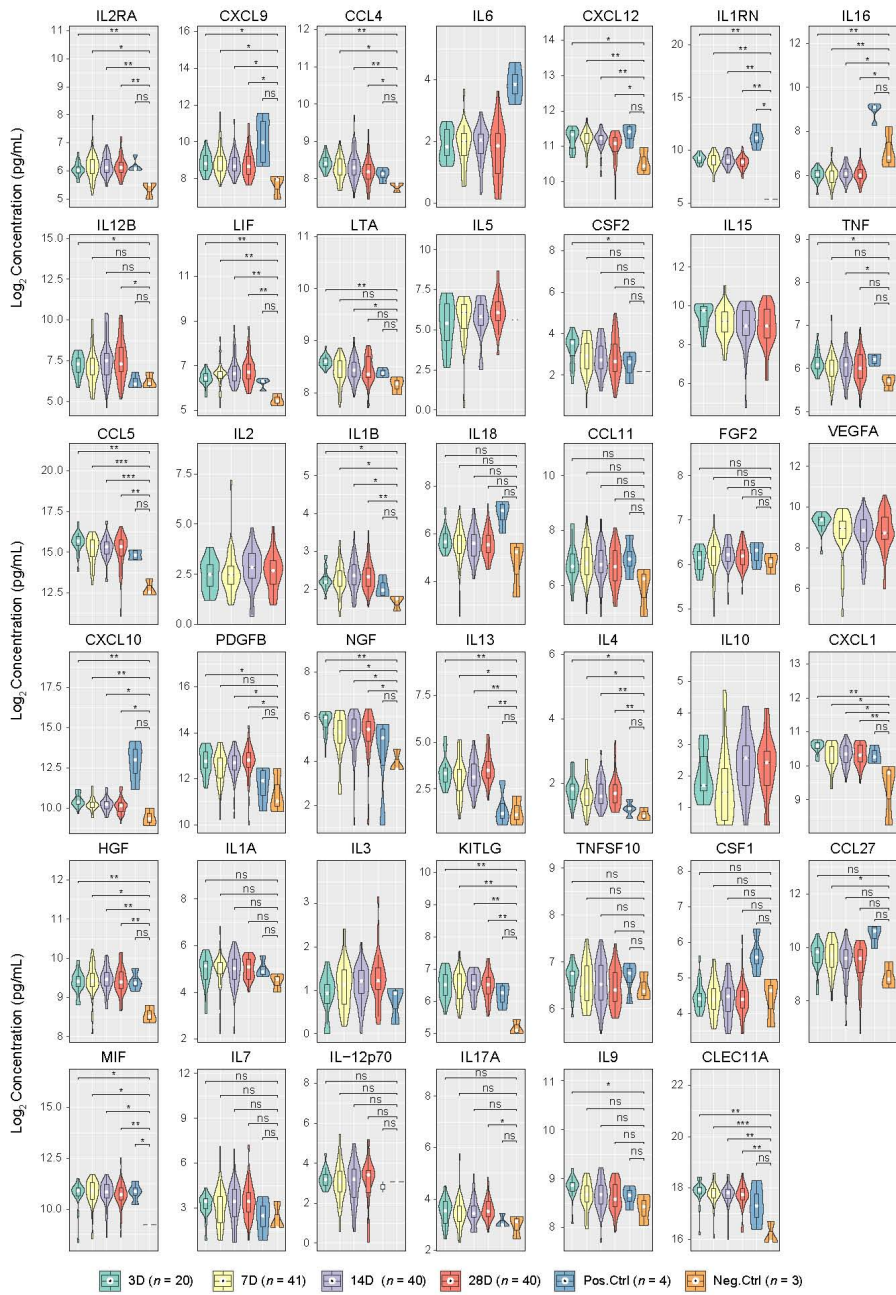

**Figure S1. Responses of cytokines and chemokines to a third dose of**

**BBIBP-CorV. Related to Figure 2.**

Violin plots of representative cytokines/chemokines induced by the third dose of

BBIBP-CorV. P values of Wilcoxon tests are shown on each plot. \*  $P_{\text{adj}} < 0.05$ , \*\*  $P_{\text{adj}}$

$< 0.01$ , \*\*\*  $P_{\text{adj}} < 0.001$ , \*\*\*\*  $P_{\text{adj}} < 0.0001$ ; ns, not significant.

Figure S2

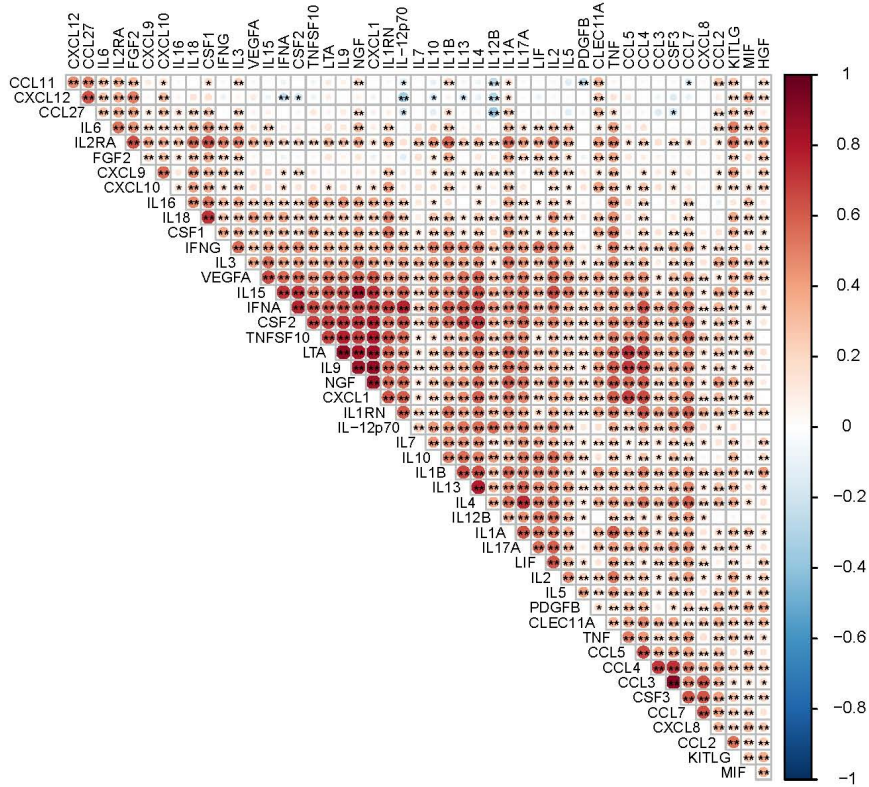

Figure S2. Correlation between 48 cytokines/chemokines in response to a third dose of BBIBP-CorV. Related to Figure 2.
